# Supplementary material for: Early adolescent aggression predicts antisocial personality disorder in young adults: a population-based study
Source: PubMed Central journal article supplement (PMC6407741; doi:10.1007/s00787-018-1198-9), 2018-07-17
Supplement: 787_2018_1198_MOESM1_ESM.pdf [file 787_2018_1198_MOESM1_ESM.pdf]

**Online Resource 1.** Flow chart of FinnTwin12 study waves and data collection included in the current study

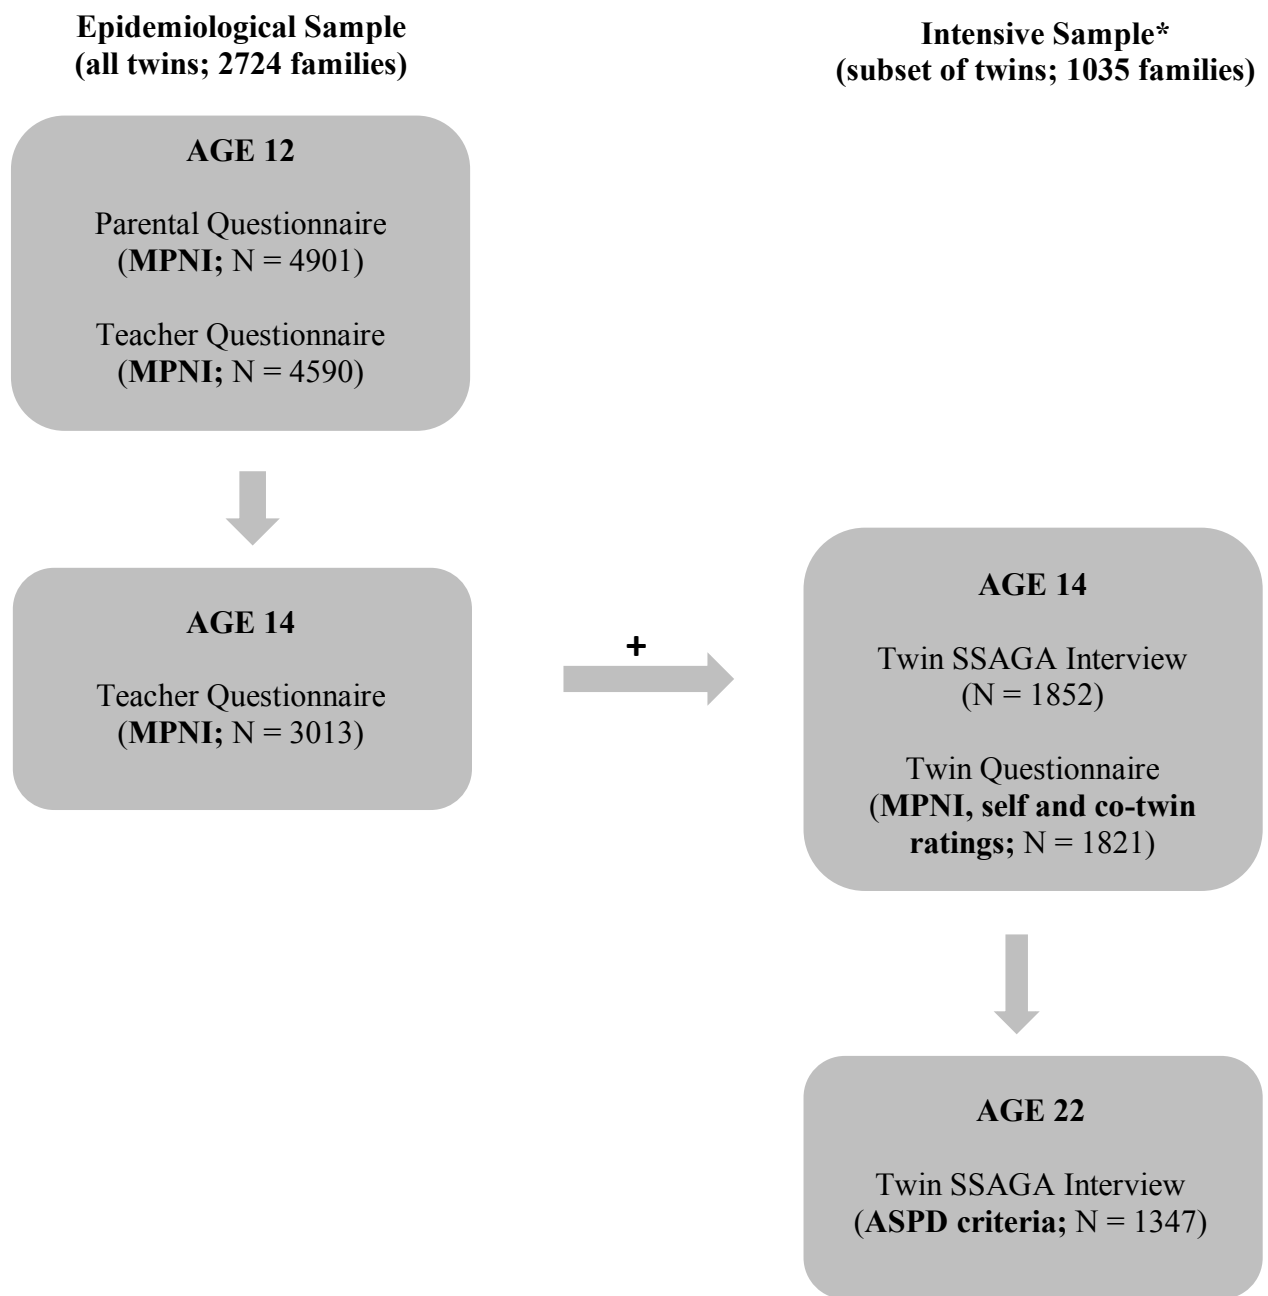

\*Data for intensive sample participants includes both epidemiological sample data collection materials as well as intensive sample data collection materials

**Abbreviations:** ASPD=Antisocial Personality Disorder; MPNI=Multidimensional Peer Nomination Inventory; SSAGA=Semi-Structured Assessment for the Genetics of Alcoholism

**Online Resource 2.** Direct and indirect mean aggression score comparisons from different informants by sex

| <b>Informant (age of participant)</b> | <b>Sex</b> | <b>N</b> | <b>Direct Aggression Mean (SD)</b> | <b>N</b> | <b>Indirect Aggression Mean (SD)</b> |
|---------------------------------------|------------|----------|------------------------------------|----------|--------------------------------------|
| Parent (12)                           | Female     | 668      | 0.60 (0.43)*                       | 668      | 0.45 (0.50)*                         |
|                                       | Male       | 610      | 0.76 (0.49)*                       | 609      | 0.36 (0.48)*                         |
| Teacher (12)                          | Female     | 690      | 0.47 (0.59)*                       | 686      | 0.64 (0.70)*                         |
|                                       | Male       | 615      | 0.86 (0.77)*                       | 606      | 0.55 (0.66)*                         |
| Teacher (14)                          | Female     | 549      | 0.20 (0.37)*                       | 541      | 0.27 (0.47)                          |
|                                       | Male       | 467      | 0.47 (0.61)*                       | 453      | 0.28 (0.49)                          |
| Self (14)                             | Female     | 695      | 0.43 (0.35)*                       | 694      | 0.33 (0.45)*                         |
|                                       | Male       | 618      | 0.63 (0.43)*                       | 613      | 0.41 (0.50)*                         |
| Co-Twin (14)                          | Female     | 648      | 0.49 (0.46)*                       | 642      | 0.47 (0.61)                          |
|                                       | Male       | 561      | 0.77 (0.56)*                       | 559      | 0.53 (0.62)                          |

\*Mean difference between males and females is significant at  $p < 0.05$

Abbreviation: SD=standard deviation

### Online Resource 3. Impulsivity analyses

Table: Impulsivity mean score comparisons from different informants by ASPD diagnosis and sex

| Informant (age of participant) | Sex      | No ASPD | ASPD | P-value <sup>a</sup> | Effect Size <sup>b</sup> |
|--------------------------------|----------|---------|------|----------------------|--------------------------|
| Parent (12)                    | Combined | 0.71    | 0.94 | 0.004                | 0.23                     |
|                                | Female   | 0.64    | 0.78 | 0.206                |                          |
|                                | Male     | 0.78    | 1.01 | 0.027                |                          |
| Teacher (12)                   | Combined | 0.66    | 1.14 | <0.001               | 0.48                     |
|                                | Female   | 0.45    | 0.51 | 0.711                |                          |
|                                | Male     | 0.89    | 1.48 | <0.001               |                          |
| Teacher (14)                   | Combined | 0.48    | 1.01 | <0.001               | 0.53                     |
|                                | Female   | 0.32    | 0.71 | 0.005                |                          |
|                                | Male     | 0.68    | 1.17 | <0.001               |                          |
| Self (14)                      | Combined | 0.76    | 1.09 | <0.001               | 0.33                     |
|                                | Female   | 0.75    | 1.02 | 0.022                |                          |
|                                | Male     | 0.77    | 1.13 | <0.001               |                          |
| Co-Twin (14)                   | Combined | 0.76    | 1.23 | <0.001               | 0.47                     |
|                                | Female   | 0.68    | 0.97 | 0.025                |                          |
|                                | Male     | 0.86    | 1.38 | <0.001               |                          |

<sup>a</sup>Mean differences evaluated using adjusted Wald test

<sup>b</sup>Cohen's *d*

ASPD: antisocial personality disorder

**Online Resource 3 (cont).**

Table: Pearson correlations between different informants' impulsivity and total aggression scores

| <b>Informant,<br/>age, score</b> | P12<br>Agg | T12<br>Imp | T12<br>Agg | T14<br>Imp | T14<br>Agg | S14<br>Imp | S14<br>Agg | Tw14<br>Imp | Tw14<br>Agg |
|----------------------------------|------------|------------|------------|------------|------------|------------|------------|-------------|-------------|
| P12 Imp                          | 0.54       | 0.42       | 0.31       | 0.34       | 0.25       | 0.28       | 0.10       | 0.39        | 0.20        |
| P12 Agg                          |            | 0.21       | 0.26       | 0.15       | 0.15       | 0.16       | 0.13       | 0.22        | 0.27        |
| T12 Imp                          |            |            | 0.73       | 0.49       | 0.39       | 0.33       | 0.19       | 0.41        | 0.19        |
| T12 Agg                          |            |            |            | 0.36       | 0.36       | 0.26       | 0.18       | 0.33        | 0.22        |
| T14 Imp                          |            |            |            |            | 0.68       | 0.39       | 0.20       | 0.47        | 0.24        |
| T14 Agg                          |            |            |            |            |            | 0.27       | 0.18       | 0.33        | 0.21        |
| S14 Imp                          |            |            |            |            |            |            | 0.38       | 0.51        | 0.21        |
| S14 Agg                          |            |            |            |            |            |            |            | 0.23        | 0.33        |
| Tw14 Imp                         |            |            |            |            |            |            |            |             | 0.47        |

P: parent rating; T: teacher rating; S: self rating; Tw: co-twin rating; Imp: impulsivity; Agg: aggression

**Online Resource 3 (cont).**

Table: Logistic regression models and AUC values for ASPD prediction by each informant's standardized impulsivity score, adjusted for sex and age

| <b>Informant (age of participant)</b> | <b>Model Variable</b> | <b>OR</b> | <b>95% CIs</b> | <b>AUC</b> |
|---------------------------------------|-----------------------|-----------|----------------|------------|
| Parent (12)                           | Impulsivity           | 1.4*      | 1.1, 1.8       | 0.65       |
|                                       | Sex                   | 2.1*      | 1.2, 3.6       |            |
| Teacher (12)                          | Impulsivity           | 1.6*      | 1.3, 2.0       | 0.67       |
|                                       | Sex                   | 1.5       | 0.9, 2.5       |            |
| Teacher (14)                          | Impulsivity           | 1.7*      | 1.4, 2.1       | 0.73       |
|                                       | Sex                   | 1.6       | 0.8, 2.9       |            |
| Self (14)                             | Impulsivity           | 1.8*      | 1.5, 2.3       | 0.72       |
|                                       | Sex                   | 1.9*      | 1.1, 3.1       |            |
| Co-Twin (14)                          | Impulsivity           | 2.0*      | 1.6, 2.5       | 0.71       |
|                                       | Sex                   | 1.5       | 0.9, 2.5       |            |

ASPD: antisocial personality disorder; CI: confidence interval; OR: odds ratio; AUC: area under the (receiver operating characteristic) curve

**Online Resource 3 (cont).**

Table: Logistic regression models for ASPD prediction by each informant's standardized aggression (with impulsivity effect removed) or impulsivity (with aggression effect removed) score, adjusted by sex and age

| Informant<br>(age of<br>participant) | Aggression (residual) scores |      |          |      | Impulsivity (residual) scores |      |          |      |
|--------------------------------------|------------------------------|------|----------|------|-------------------------------|------|----------|------|
|                                      | Model<br>Variable            | OR   | 95% CIs  | AUC  | Model<br>Variable             | OR   | 95% CIs  | AUC  |
| Parent (12)                          |                              |      |          | 0.64 |                               |      |          | 0.64 |
|                                      | Residual<br>variable         | 1.1  | 0.9, 1.4 |      | Residual<br>variable          | 1.3  | 1.0, 1.6 |      |
|                                      | Sex                          | 2.3* | 1.4, 4.0 |      | Sex                           | 2.2* | 1.3, 3.8 |      |
| Teacher (12)                         |                              |      |          | 0.63 |                               |      |          | 0.61 |
|                                      | Residual<br>variable         | 1.2  | 1.0, 1.6 |      | Residual<br>variable          | 1.2  | 0.9, 1.6 |      |
|                                      | Sex                          | 2.3* | 1.3, 3.8 |      | Sex                           | 1.9* | 1.1, 3.2 |      |
| Teacher (14)                         |                              |      |          | 0.65 |                               |      |          | 0.64 |
|                                      | Residual<br>variable         | 1.4* | 1.1, 1.8 |      | Residual<br>variable          | 1.1  | 0.9, 1.5 |      |
|                                      | Sex                          | 2.2* | 1.2, 4.0 |      | Sex                           | 2.2* | 1.2, 4.0 |      |
| Self (14)                            |                              |      |          | 0.68 |                               |      |          | 0.67 |
|                                      | Residual<br>variable         | 1.6* | 1.3, 2.0 |      | Residual<br>variable          | 1.5* | 1.2, 1.9 |      |
|                                      | Sex                          | 1.5  | 0.9, 2.6 |      | Sex                           | 2.0* | 1.2, 3.4 |      |
| Co-Twin (14)                         |                              |      |          | 0.63 |                               |      |          | 0.67 |
|                                      | Residual<br>variable         | 1.3* | 1.0, 1.7 |      | Residual<br>variable          | 1.6* | 1.3, 2.1 |      |
|                                      | Sex                          | 1.8* | 1.0, 3.2 |      | Sex                           | 1.8* | 1.0, 3.1 |      |

\*p<0.05

Abbreviations: ASPD=antisocial personality disorder; CI=confidence interval; OR=odds ratio; AUC=area under the (receiver operating characteristic) curve

**Online Resource 3 (cont).**

Table: Multiple informant logistic regression model combination of impulsivity and total aggression scores for ASPD prediction, adjusted by sex and age

| Model <sup>a</sup>                                  | Model Variable | OR   | 95% CIs  | AUC  |
|-----------------------------------------------------|----------------|------|----------|------|
| All aggression + P12, S14, Tw14 impulsivity ratings | P12A           | 1.2  | 0.9, 1.6 | 0.82 |
|                                                     | T12A           | 1.2  | 0.9, 1.7 |      |
|                                                     | T14A           | 1.5* | 1.1, 2.0 |      |
|                                                     | S14A           | 1.5* | 1.1, 2.1 |      |
|                                                     | Tw14A          | 1.0  | 0.7, 1.4 |      |
|                                                     | P12I           | 1.0  | 0.7,     |      |
|                                                     | S14I           | 1.2  |          |      |
|                                                     | Tw14I          | 1.3  |          |      |
|                                                     | Sex            | 1.2  | 0.6, 2.7 |      |

P: parent rating; T: teacher rating; S: self rating; Tw: co-twin rating; A: aggression; I: impulsivity; ASPD: antisocial personality disorder; CI: confidence interval; OR: odds ratio; AUC: area under the (receiver operating characteristic) curve

<sup>a</sup>This model is significantly different (i.e., 'better';  $p=0.015$ ) than the PR12 + TR12 + TR14 + SR14 + TWR14 model in the main text Table 4.

**Online Resource 4.** Alternative anxiety rating logistic regression model for ASPD prediction

| <b>Models with anxiety ratings (instead of aggression), adjusted for sex and age</b> |          |                       |           |                |            |                |
|--------------------------------------------------------------------------------------|----------|-----------------------|-----------|----------------|------------|----------------|
| <b>Model</b>                                                                         | <b>N</b> | <b>Model Variable</b> | <b>OR</b> | <b>95% CIs</b> | <b>AUC</b> | <b>95% CIs</b> |
| Parent (12)                                                                          | 1278     | Anxiety Rating        | 0.9       | 0.7, 1.2       | 0.61       | 0.54, 0.68     |
|                                                                                      |          | Sex                   | 2.3*      | 1.4, 3.9       |            |                |
| Teacher (12)                                                                         | 1301     | Anxiety Rating        | 0.8       | 0.6, 1.0       | 0.63       | 0.56, 0.70     |
|                                                                                      |          | Sex                   | 2.2*      | 1.3, 3.7       |            |                |
| Teacher (14)                                                                         | 1016     | Anxiety Rating        | 0.9       | 0.7, 1.2       | 0.61       | 0.53, 0.70     |
|                                                                                      |          | Sex                   | 2.2*      | 1.2, 4.0       |            |                |
| Self (14)                                                                            | 1312     | Anxiety Rating        | 0.9       | 0.7, 1.2       | 0.60       | 0.54, 0.66     |
|                                                                                      |          | Sex                   | 1.8*      | 1.1, 3.1       |            |                |
| Co-twin (14)                                                                         | 1299     | Anxiety Rating        | 0.9       | 0.7, 1.1       | 0.60       | 0.54, 0.67     |
|                                                                                      |          | Sex                   | 2.0*      | 1.2, 3.4       |            |                |

\*p<0.05

Abbreviations: ASPD=antisocial personality disorder; CI=confidence interval; OR=odds ratio; AUC=area under the (receiver operating characteristic) curve



**Online Resource 5.** Alternative ASPD diagnostic cut-off logistic regression models

| <b>ASP diagnosis if 1+ criteria</b> |          |                         |           |                |            |                |
|-------------------------------------|----------|-------------------------|-----------|----------------|------------|----------------|
| <b>Model</b>                        | <b>N</b> | <b>Model Variable</b>   | <b>OR</b> | <b>95% CIs</b> | <b>AUC</b> | <b>95% CIs</b> |
| Parent rating (12)                  | 1278     | Total Aggression Rating | 1.3*      | 1.2, 1.5       | 0.63       | 0.57, 0.70     |
|                                     |          | Sex                     | 1.8*      | 1.4, 2.3       |            |                |
| Teacher rating (12)                 | 1302     | Total Aggression Rating | 1.4*      | 1.3, 1.6       | 0.68       | 0.60, 0.75     |
|                                     |          | Sex                     | 1.7*      | 1.3, 2.1       |            |                |
| Teacher rating (14)                 | 1013     | Total Aggression Rating | 1.3*      | 1.1, 1.5       | 0.70       | 0.62, 0.79     |
|                                     |          | Sex                     | 1.7*      | 1.3, 2.3       |            |                |
| Self-rating (14)                    | 1312     | Total Aggression Rating | 1.3*      | 1.2, 1.5       | 0.69       | 0.62, 0.76     |
|                                     |          | Sex                     | 1.6*      | 1.3, 2.1       |            |                |
| Co-twin rating (14)                 | 1208     | Total Aggression Rating | 1.5*      | 1.3, 1.7       | 0.68       | 0.60, 0.75     |
|                                     |          | Sex                     | 1.6*      | 1.2, 2.0       |            |                |
| <b>ASP diagnosis if 2+ criteria</b> |          |                         |           |                |            |                |
| <b>Model</b>                        | <b>N</b> | <b>Model Variable</b>   | <b>OR</b> | <b>95% CIs</b> | <b>AUC</b> | <b>95% CIs</b> |
| Parent rating (12)                  | 1278     | Total Aggression Rating | 1.3*      | 1.1, 1.5       | 0.64       | 0.57, 0.71     |
|                                     |          | Sex                     | 1.7*      | 1.2, 2.5       |            |                |
| Teacher rating (12)                 | 1302     | Total Aggression Rating | 1.4*      | 1.2, 1.6       | 0.68       | 0.61, 0.75     |
|                                     |          | Sex                     | 1.6*      | 1.1, 2.2       |            |                |
| Teacher rating (14)                 | 1013     | Total Aggression Rating | 1.4*      | 1.2, 1.7       | 0.71       | 0.63, 0.80     |
|                                     |          | Sex                     | 1.7*      | 1.1, 2.6       |            |                |
| Self-rating (14)                    | 1312     | Total Aggression Rating | 1.6*      | 1.3, 1.8       | 0.71       | 0.64, 0.78     |
|                                     |          | Sex                     | 1.4*      | 1.0, 2.0       |            |                |
| Co-twin rating (14)                 | 1208     | Total Aggression Rating | 1.6*      | 1.3, 1.8       | 0.68       | 0.60, 0.76     |
|                                     |          | Sex                     | 1.6*      | 1.1, 2.3       |            |                |

**Online Resource 5 (cont.)**

| <b>ASP diagnosis if 4+ criteria</b>                  |          |                         |           |                |            |                |
|------------------------------------------------------|----------|-------------------------|-----------|----------------|------------|----------------|
| <b>Model</b>                                         | <b>N</b> | <b>Model Variable</b>   | <b>OR</b> | <b>95% CIs</b> | <b>AUC</b> | <b>95% CIs</b> |
| Parent rating (12)                                   | 1278     | Total Aggression Rating | 1.4*      | 1.1, 1.8       | 0.65       | 0.59, 0.71     |
|                                                      |          | Sex                     | 2.5*      | 1.2, 5.2       |            |                |
| Teacher rating (12)                                  | 1302     | Total Aggression Rating | 1.5*      | 1.2, 1.8       | 0.68       | 0.62, 0.75     |
|                                                      |          | Sex                     | 2.2*      | 1.1, 4.4       |            |                |
| Teacher rating (14)                                  | 1013     | Total Aggression Rating | 1.6*      | 1.3, 2.0       | 0.72       | 0.64, 0.79     |
|                                                      |          | Sex                     | 2.2       | 0.9, 5.2       |            |                |
| Self-rating (14)                                     | 1312     | Total Aggression Rating | 2.0*      | 1.6, 2.5       | 0.72       | 0.66, 0.79     |
|                                                      |          | Sex                     | 1.4       | 0.7, 2.9       |            |                |
| Co-twin rating (14)                                  | 1208     | Total Aggression Rating | 1.8*      | 1.3, 2.4       | 0.69       | 0.62, 0.76     |
|                                                      |          | Sex                     | 1.7       | 0.8, 3.7       |            |                |
| <b>Subclinical cases (1-2 ASPD criteria) removed</b> |          |                         |           |                |            |                |
| <b>Model</b>                                         | <b>N</b> | <b>Model Variable</b>   | <b>OR</b> | <b>95% CIs</b> | <b>AUC</b> | <b>95% CIs</b> |
| Parent rating (12)                                   | 818      | Total Aggression Rating | 1.4*      | 1.2, 1.7       | 0.69       | 0.63, 0.76     |
|                                                      |          | Sex                     | 2.8*      | 1.6, 4.8       |            |                |
| Teacher rating (12)                                  | 842      | Total Aggression Rating | 1.8*      | 1.4, 2.2       | 0.72       | 0.66, 0.79     |
|                                                      |          | Sex                     | 2.1*      | 1.2, 3.6       |            |                |
| Teacher rating (14)                                  | 664      | Total Aggression Rating | 1.8*      | 1.4, 2.2       | 0.75       | 0.68, 0.83     |
|                                                      |          | Sex                     | 2.1*      | 1.1, 3.9       |            |                |
| Self-rating (14)                                     | 848      | Total Aggression Rating | 2.1*      | 1.6, 2.6       | 0.75       | 0.68, 0.82     |
|                                                      |          | Sex                     | 1.7       | 1.0, 2.9       |            |                |
| Co-twin rating (14)                                  | 773      | Total Aggression Rating | 1.9*      | 1.5, 2.4       | 0.73       | 0.66, 0.80     |
|                                                      |          | Sex                     | 2.0*      | 1.1, 3.6       |            |                |

\*p<0.05

Abbreviations: ASPD=antisocial personality disorder; CI=confidence interval; OR=odds ratio; AUC=area under the (receiver operating characteristic) curve

**Online Resource 6.** Logistic regression models for ASPD prediction by each informant's standardized direct (with indirect aggression effect removed) or indirect (with direct aggression effect removed) aggression score, adjusted by sex and age

| Informant<br>(age of<br>participant) | N    | Direct (residual) aggression score |      |            |      |            | Indirect (residual) aggression score |      |          |      |            |
|--------------------------------------|------|------------------------------------|------|------------|------|------------|--------------------------------------|------|----------|------|------------|
|                                      |      | Model<br>Variable                  | OR   | 95%<br>CIs | AUC  | 95% CIs    | Model<br>Variable                    | OR   | 95% CIs  | AUC  | 95% CIs    |
| Parent (12)                          | 1277 |                                    |      |            | 0.66 | 0.60, 0.72 |                                      |      |          | 0.61 | 0.55, 0.67 |
|                                      |      | Residual<br>variable               | 1.4* | 1.1, 1.8   |      |            | Residual<br>variable                 | 0.9  | 0.7, 1.1 |      |            |
|                                      |      | Sex                                | 2.0* | 1.2, 3.5   |      |            | Sex                                  | 2.3* | 1.3, 3.9 |      |            |
| Teacher (12)                         | 1292 |                                    |      |            | 0.67 | 0.60, 0.74 |                                      |      |          | 0.61 | 0.54, 0.67 |
|                                      |      | Residual<br>variable               | 1.7* | 1.3, 2.1   |      |            | Residual<br>variable                 | 0.9  | 0.6, 1.3 |      |            |
|                                      |      | Sex                                | 1.4  | 0.8, 2.4   |      |            | Sex                                  | 2.0* | 1.1, 3.5 |      |            |
| Teacher (14)                         | 994  |                                    |      |            | 0.69 | 0.60, 0.77 |                                      |      |          | 0.60 | 0.51, 0.69 |
|                                      |      | Residual<br>variable               | 1.6* | 1.2, 2.1   |      |            | Residual<br>variable                 | 1.1  | 0.8, 1.6 |      |            |
|                                      |      | Sex                                | 1.6  | 0.8, 3.2   |      |            | Sex                                  | 2.4* | 1.3, 4.5 |      |            |
| Self (14)                            | 1307 |                                    |      |            | 0.64 | 0.57, 0.72 |                                      |      |          | 0.65 | 0.58, 0.72 |
|                                      |      | Residual<br>variable               | 1.4* | 1.2, 1.8   |      |            | Residual<br>variable                 | 1.4* | 1.1, 1.7 |      |            |
|                                      |      | Sex                                | 1.6  | 0.9, 2.7   |      |            | Sex                                  | 1.9* | 1.1, 3.2 |      |            |
| Co-Twin (14)                         | 1201 |                                    |      |            | 0.66 | 0.58, 0.74 |                                      |      |          | 0.60 | 0.54, 0.66 |
|                                      |      | Residual<br>variable               | 1.6* | 1.3, 2.0   |      |            | Residual<br>variable                 | 1.1  | 0.6, 1.7 |      |            |
|                                      |      | Sex                                | 1.5  | 0.9, 2.6   |      |            | Sex                                  | 2.0* | 1.2, 3.5 |      |            |

\*p<0.05

Abbreviations: ASPD=antisocial personality disorder; CI=confidence interval; OR=odds ratio; AUC=area under the (receiver operating characteristic) curve

**Online Resource 7.** Attrition analysis comparing total aggression rating means, standard deviations (SD), and ranges for different sample sizes and data collection timepoints

| <b>Sample</b>                                                                                                                   | <b>Rating</b> | <b>N</b> | <b>Mean</b> | <b>SD</b> | <b>Range</b> |
|---------------------------------------------------------------------------------------------------------------------------------|---------------|----------|-------------|-----------|--------------|
| All available FinnTwin12 participants (combined)                                                                                | Parent (12)   | 4889     | 0.59        | 0.41      | 0-3          |
|                                                                                                                                 | Teacher (12)  | 4589     | 0.62        | 0.64      | 0-3          |
| All FinnTwin12 participants (except the 1347 in the final sample)                                                               | Parent (12)   | 3610     | 0.59        | 0.42      | 0-3          |
|                                                                                                                                 | Teacher (12)  | 3284     | 0.62        | 0.64      | 0-3          |
| All available age 14 Intensive participants                                                                                     | Parent (12)   | 1745     | 0.60        | 0.41      | 0-2.5        |
|                                                                                                                                 | Teacher (12)  | 1782     | 0.65        | 0.65      | 0-3          |
| All available age 22 Intensive participants                                                                                     | Parent (12)   | 1279     | 0.59        | 0.40      | 0-2.3        |
|                                                                                                                                 | Teacher (12)  | 1305     | 0.63        | 0.63      | 0-3          |
| Those age 22 intensives w/only one twin available for age 22 even though both twins participated in age 14 intensive evaluation | Parent (12)   | 90       | 0.60        | 0.46      | 0-2.3        |
|                                                                                                                                 | Teacher (12)  | 94       | 0.68        | 0.73      | 0-2.8        |
| Those age 22 intensives w/both twins available for both age 14 and age 22 intensive evaluations                                 | Parent (12)   | 1168     | 0.58        | 0.39      | 0-2.3        |
|                                                                                                                                 | Teacher (12)  | 1190     | 0.63        | 0.63      | 0-3          |
